# Supplementary material for: Identification of non-invasive biomarkers for predicting the radiosensitivity of nasopharyngeal carcinoma from serum microRNAs
Source: PubMed Central journal article supplement (PMC7083955; doi:10.1038/s41598-020-61958-4), 2020-03-20
Supplement: 41598_2020_61958_MOESM1_ESM.pdf [file 41598_2020_61958_MOESM1_ESM.pdf]

# Identification of non-invasive biomarkers for predicting the radiosensitivity of nasopharyngeal carcinoma from serum microRNAs

Kaiguo Li <sup>1</sup>, Xiaodong Zhu <sup>1,2</sup>, Ling Li <sup>1</sup>, Ruiling Ning <sup>1</sup>, Zhongguo Liang <sup>1</sup>, Fanyan Zeng <sup>1</sup>, Fang Su <sup>1</sup>, Shiting Huang <sup>1</sup>, Xiaohui Yang <sup>1</sup>, Song Qu <sup>1,2,\*</sup>

Table-S1. Clinical data of the study population

| Patient | Sex    | Age(y) | Stage | Therapeutic regime           | Radiosensitivity |
|---------|--------|--------|-------|------------------------------|------------------|
| S-1-1   | male   | 24     | I     | radiotherapy                 | radiosensitive   |
| S-1-2   | female | 44     | I     | radiotherapy                 | radiosensitive   |
| S-2-1   | male   | 32     | II    | radiotherapy                 | radiosensitive   |
| S-2-2   | male   | 49     | II    | radiotherapy                 | radiosensitive   |
| S-2-3   | female | 47     | II    | radiotherapy                 | radiosensitive   |
| S-2-4   | male   | 34     | II    | radiotherapy                 | radiosensitive   |
| S-2-5   | male   | 60     | II    | radiotherapy                 | radiosensitive   |
| S-2-6   | female | 52     | II    | radiotherapy                 | radiosensitive   |
| S-2-7   | male   | 44     | II    | radiotherapy                 | radiosensitive   |
| S-2-8   | male   | 56     | II    | radiotherapy                 | radiosensitive   |
| S-2-9   | male   | 51     | II    | radiotherapy                 | radiosensitive   |
| S-2-10  | female | 49     | II    | radiotherapy                 | radiosensitive   |
| S-2-11  | female | 53     | II    | radiotherapy                 | radiosensitive   |
| S-2-12  | male   | 56     | II    | radiotherapy                 | radiosensitive   |
| S-3-1   | male   | 68     | III   | radiotherapy                 | radiosensitive   |
| S-3-2   | male   | 65     | III   | radiotherapy                 | radiosensitive   |
| S-4-1   | male   | 41     | IV    | radiotherapy                 | radiosensitive   |
| S-4-2   | female | 36     | IV    | radiotherapy                 | radiosensitive   |
| S-4-3   | female | 64     | IV    | radiotherapy                 | radiosensitive   |
| R-2-1   | male   | 28     | II    | radiotherapy                 | radioresistant   |
| R-2-2   | female | 31     | II    | concurrent chemoradiotherapy | radioresistant   |
| R-3-1   | male   | 37     | III   | radiotherapy                 | radioresistant   |
| R-3-2   | female | 70     | III   | radiotherapy                 | radioresistant   |
| R-4-1   | male   | 59     | IV    | concurrent chemoradiotherapy | radioresistant   |
| R-4-2   | male   | 30     | IV    | concurrent chemoradiotherapy | radioresistant   |
| R-4-3   | female | 50     | IV    | concurrent chemoradiotherapy | radioresistant   |

|        |        |    |    |                                                          |                |
|--------|--------|----|----|----------------------------------------------------------|----------------|
| R-4-4  | female | 66 | IV | radiotherapy                                             | radioresistant |
| R-4-5  | male   | 44 | IV | induction chemotherapy +<br>concurrent radiochemotherapy | radioresistant |
| R-4-6  | male   | 50 | IV | concurrent chemoradiotherapy                             | radioresistant |
| R-4-7  | male   | 45 | IV | induction chemotherapy +<br>concurrent radiochemotherapy | radioresistant |
| R-4-8  | male   | 59 | IV | induction chemotherapy +<br>concurrent radiochemotherapy | radioresistant |
| R-4-9  | male   | 47 | IV | concurrent chemoradiotherapy                             | radioresistant |
| R-4-10 | male   | 36 | IV | concurrent chemoradiotherapy                             | radioresistant |

Table-S2-a. Chi-Square Tests of sex for the training cohort

|                                    | Value             | df | Asymptotic Significance<br>(2-sided) | Exact Sig.<br>(2-sided) | Exact Sig.<br>(1-sided) |
|------------------------------------|-------------------|----|--------------------------------------|-------------------------|-------------------------|
| Pearson Chi-Square                 | .686 <sup>a</sup> | 1  | .408                                 |                         |                         |
| Continuity Correction <sup>b</sup> | .043              | 1  | .836                                 |                         |                         |
| Likelihood Ratio                   | .712              | 1  | .399                                 |                         |                         |
| <b>Fisher's Exact Test</b>         |                   |    |                                      | <b>.576</b>             | <b>.424</b>             |
| Linear-by-Linear Association       | .629              | 1  | .428                                 |                         |                         |
| N of Valid Cases                   | 12                |    |                                      |                         |                         |

a. 4 cells (100.0%) have expected count less than 5. The minimum expected count is 1.67.

b. Computed only for a 2x2 table

Table-S2-b. Chi-Square Tests of age for the training cohort

|                                    | Value             | df | Asymptotic Significance<br>(2-sided) | Exact Sig.<br>(2-sided) | Exact Sig.<br>(1-sided) |
|------------------------------------|-------------------|----|--------------------------------------|-------------------------|-------------------------|
| Pearson Chi-Square                 | .114 <sup>a</sup> | 1  | .735                                 |                         |                         |
| Continuity Correction <sup>b</sup> | .000              | 1  | 1.000                                |                         |                         |
| Likelihood Ratio                   | .116              | 1  | .733                                 |                         |                         |
| <b>Fisher's Exact Test</b>         |                   |    |                                      | <b>1.000</b>            | <b>.636</b>             |
| Linear-by-Linear Association       | .105              | 1  | .746                                 |                         |                         |
| N of Valid Cases                   | 12                |    |                                      |                         |                         |

a. 3 cells (75.0%) have expected count less than 5. The minimum expected count is 1.25.

b. Computed only for a 2x2 table

Table-S2-c. Chi-Square Tests of stage for the training cohort

|                                    | Value              | df | Asymptotic Significance<br>(2-sided) | Exact Sig.<br>(2-sided) | Exact Sig.<br>(1-sided) |
|------------------------------------|--------------------|----|--------------------------------------|-------------------------|-------------------------|
| Pearson Chi-Square                 | 1.656 <sup>a</sup> | 1  | .198                                 |                         |                         |
| Continuity Correction <sup>b</sup> | .480               | 1  | .488                                 |                         |                         |
| Likelihood Ratio                   | 1.736              | 1  | .188                                 |                         |                         |
| <b>Fisher's Exact Test</b>         |                    |    |                                      | <b>.293</b>             | <b>.247</b>             |
| Linear-by-Linear Association       | 1.518              | 1  | .218                                 |                         |                         |
| N of Valid Cases                   | 12                 |    |                                      |                         |                         |

a. 4 cells (100.0%) have expected count less than 5. The minimum expected count is 2.08.

b. Computed only for a 2x2 table

Table-S2-d. Chi-Square Tests of sex for the validation cohort

|                                    | Value             | df | Asymptotic Significance<br>(2-sided) | Exact Sig.<br>(2-sided) | Exact Sig.<br>(1-sided) |
|------------------------------------|-------------------|----|--------------------------------------|-------------------------|-------------------------|
| Pearson Chi-Square                 | .268 <sup>a</sup> | 1  | .605                                 |                         |                         |
| Continuity Correction <sup>b</sup> | .017              | 1  | .897                                 |                         |                         |
| Likelihood Ratio                   | .269              | 1  | .604                                 |                         |                         |
| <b>Fisher's Exact Test</b>         |                   |    |                                      | <b>.709</b>             | <b>.450</b>             |
| Linear-by-Linear Association       | .259              | 1  | .611                                 |                         |                         |
| N of Valid Cases                   | 30                |    |                                      |                         |                         |

a. 1 cells (25.0%) have expected count less than 5. The minimum expected count is 4.67.

b. Computed only for a 2x2 table

Table-S2-e. Chi-Square Tests of age for the validation cohort

|                                    | Value             | df | Asymptotic Significance<br>(2-sided) | Exact Sig.<br>(2-sided) | Exact Sig.<br>(1-sided) |
|------------------------------------|-------------------|----|--------------------------------------|-------------------------|-------------------------|
| Pearson Chi-Square                 | .107 <sup>a</sup> | 1  | .743                                 |                         |                         |
| Continuity Correction <sup>b</sup> | .000              | 1  | 1.000                                |                         |                         |
| Likelihood Ratio                   | .108              | 1  | .743                                 |                         |                         |
| <b>Fisher's Exact Test</b>         |                   |    |                                      | <b>1.000</b>            | <b>.567</b>             |
| Linear-by-Linear Association       | .104              | 1  | .748                                 |                         |                         |
| N of Valid Cases                   | 30                |    |                                      |                         |                         |

a. 2 cells (50.0%) have expected count less than 5. The minimum expected count is 2.33.

b. Computed only for a 2x2 table

Table-S2-f. Chi-Square Tests of stage for the validation cohort

|                                    | Value              | df | Asymptotic Significance<br>(2-sided) | Exact Sig.<br>(2-sided) | Exact Sig.<br>(1-sided) |
|------------------------------------|--------------------|----|--------------------------------------|-------------------------|-------------------------|
| Pearson Chi-Square                 | 9.020 <sup>a</sup> | 1  | .003                                 |                         |                         |
| Continuity Correction <sup>b</sup> | 6.938              | 1  | .008                                 |                         |                         |
| Likelihood Ratio                   | 9.696              | 1  | .002                                 |                         |                         |
| <b>Fisher's Exact Test</b>         |                    |    |                                      | <b>.004</b>             | <b>.004</b>             |
| Linear-by-Linear Association       | 8.719              | 1  | .003                                 |                         |                         |
| N of Valid Cases                   | 30                 |    |                                      |                         |                         |

a. 0 cells (0.0%) have expected count less than 5. The minimum expected count is 6.07.

b. Computed only for a 2x2 table

Table-S3. Summary of selected 12 miRNAs in NPC with different radiosensitivity

| miRNA                  | Expression level | Fold change     | P value         | Mature sequence              | Forward primer                          |
|------------------------|------------------|-----------------|-----------------|------------------------------|-----------------------------------------|
| hsa-miR-3610           | ↑                | 19.38883        | 7.10E-05        | GAAUCGAAAGGAGGCGCCG          | GAATCGAAAGGAGGCGCC                      |
| <b>hsa-miR-1281</b>    | ↓                | <b>4.036213</b> | <b>0.000106</b> | <b>UCGCCUCCUCCUCUCC</b>      | <b>TCGCCTCCTCCTCTCCC</b>                |
| <b>hsa-miR-6732-3p</b> | ↓                | <b>12.70422</b> | <b>0.000364</b> | <b>UAACCCUGUCCUCUCCUCCAG</b> | <b>TAACCCTGTCCTCTCCCTCC</b>             |
| hsa-miR-425-3p         | ↓                | 22.41298        | 0.000487        | AUCGGAAUGUCGUGUCCGCC         | ATCGGAATGTCGTGTCCG                      |
| hsa-miR-6840-3p        | ↑                | 14.2069         | 0.000556        | GCCAGGACUUUGUGCGGGUG         | GCCAGGACTTTGTGCGG                       |
| <b>hsa-miR-6865-3p</b> | ↓                | <b>16.71123</b> | <b>0.000559</b> | <b>ACACCUCUUUCCCUACCGCC</b>  | <b>ACACCCTCTTCCCTACCG</b>               |
| hsa-miR-4634           | ↑                | 13.63916        | 0.000976        | CGGCGGACCGCCCGGG             | attaCGGCGGACCGCCCGG                     |
| hsa-miR-7111-3p        | ↓                | 12.27265        | 0.001328        | AUCCUCUUCUCCUCCUCCAG         | ATCCTCTTCCCTCCTCCAG                     |
| hsa-miR-3195           | ↑                | 9.770501        | 0.001664        | CGCGCCGGCCCGGGUU             | atattCGCGCCGGCCCGGTT                    |
| hsa-miR-1908-3p        | ↓                | 7.889484        | 0.004336        | CCGGCCCGGCCUCCGCCCG          | atattCCGGCCCGGCTCCGC                    |
| hsa-miR-4763-3p        | ↑                | 13.91462        | 0.004562        | AGGCAGGGCUGGUGUGGGCGGG       | atAGGCAGGGCTGGTGCT                      |
| <b>hsa-miR-1825</b>    | ↓                | <b>7.464135</b> | <b>0.005255</b> | <b>UCCAGUGCCUCCUCC</b>       | <b>No. CD201-0078 (TIANGEN Biotech)</b> |

↑: upregulated; ↓: downregulated.

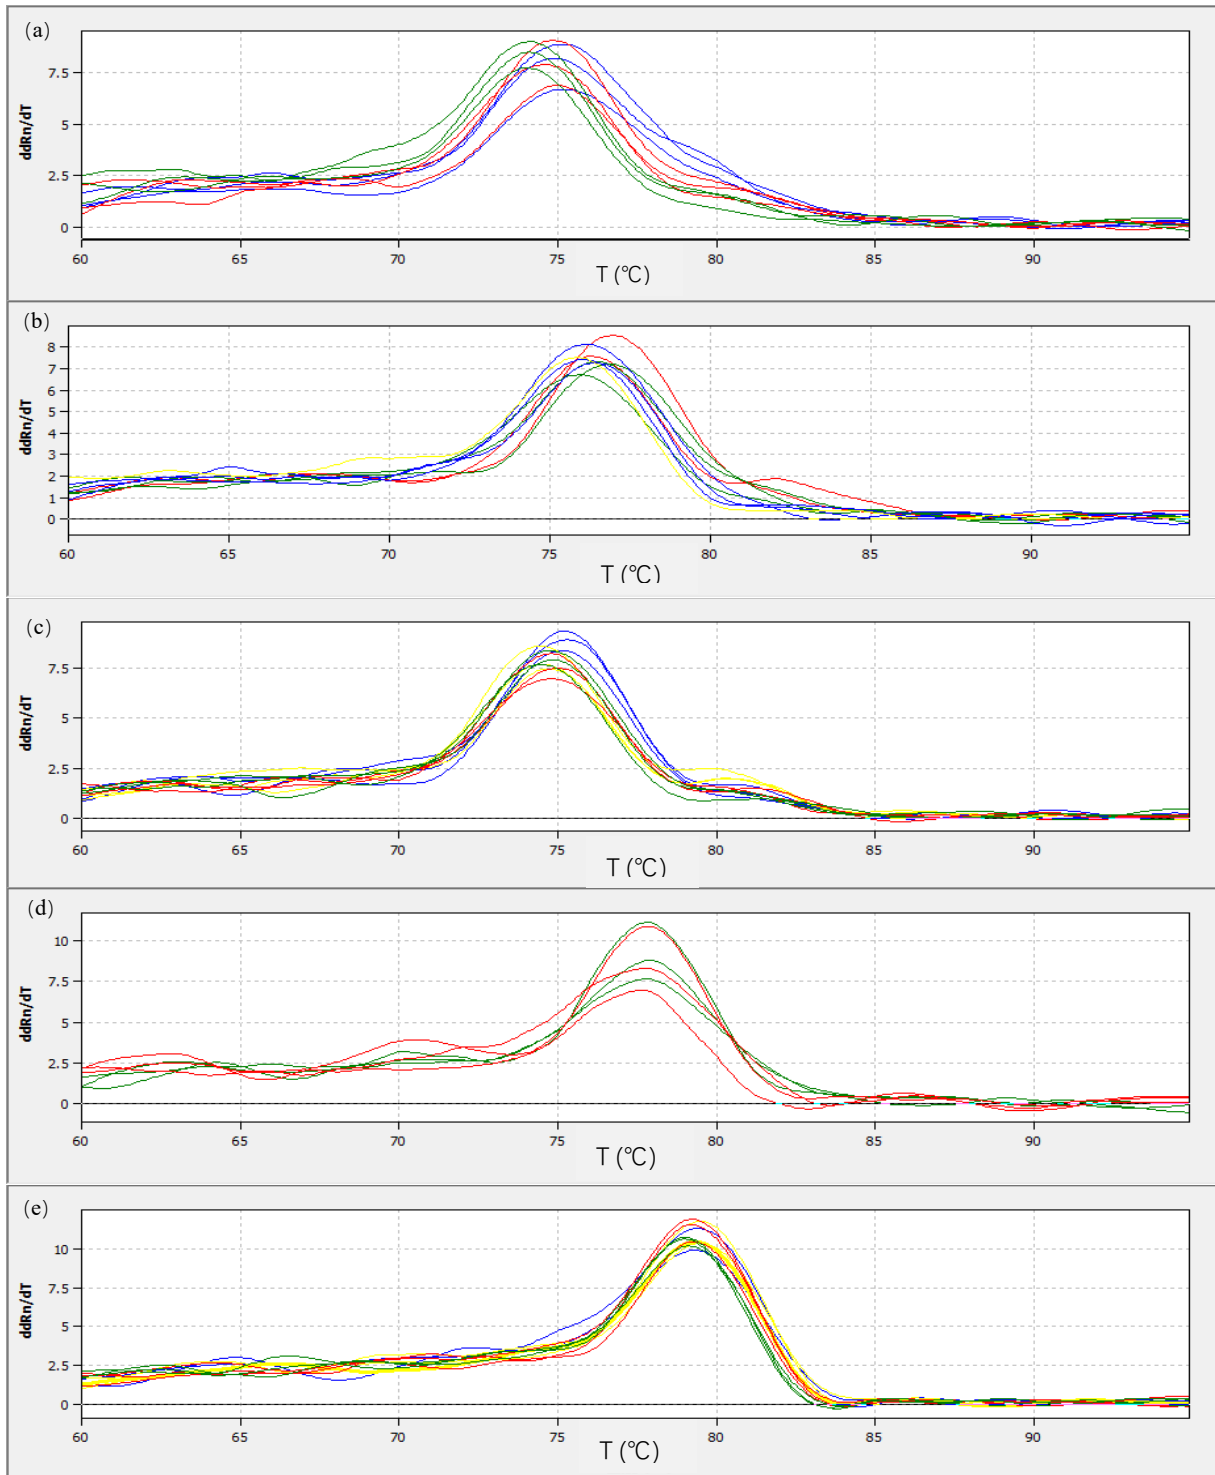

Figure-S1: Melting curves of candidate miRNAs (a.hsa-miR-1281; b.hsa-miR-1825; c.hsa-miR-6732-3p; d.hsa-miR-6865-3p; e.U6)

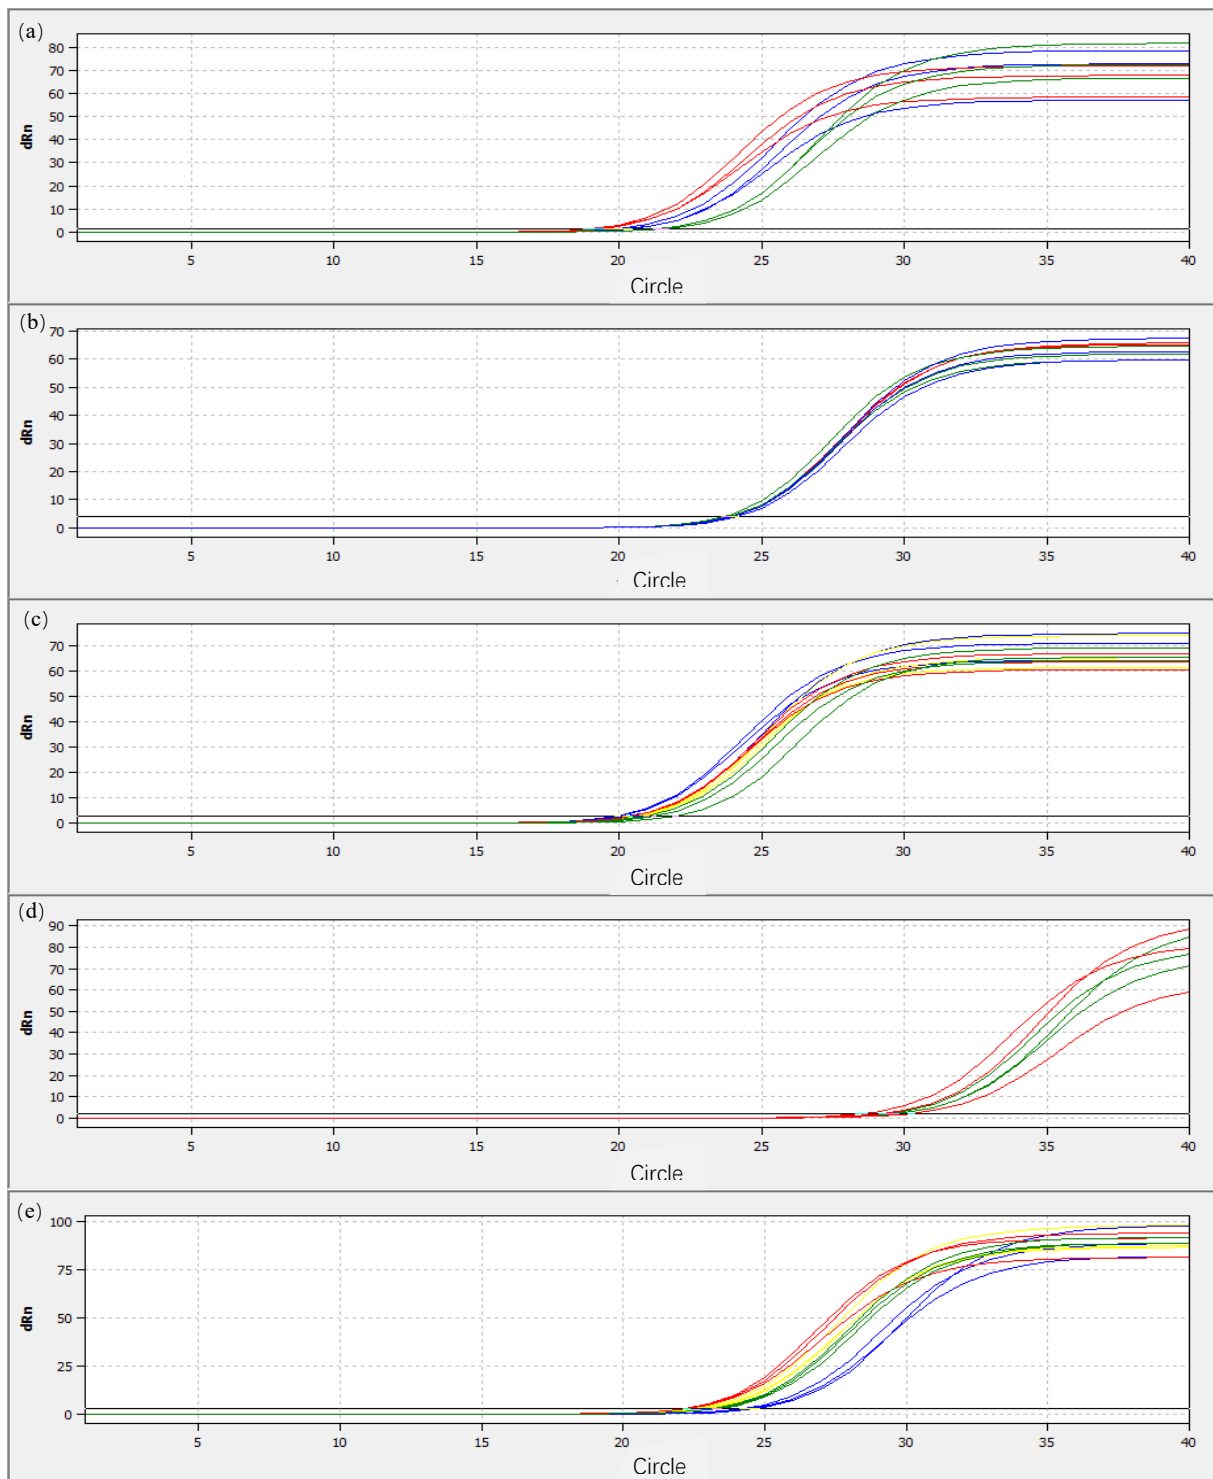

Figure-S2: Amplification curves of candidate miRNAs (a.hsa-miR-1281; b.hsa-miR-1825; c.hsa-miR-6732-3p; d.hsa-miR-6865-3p; e.U6)

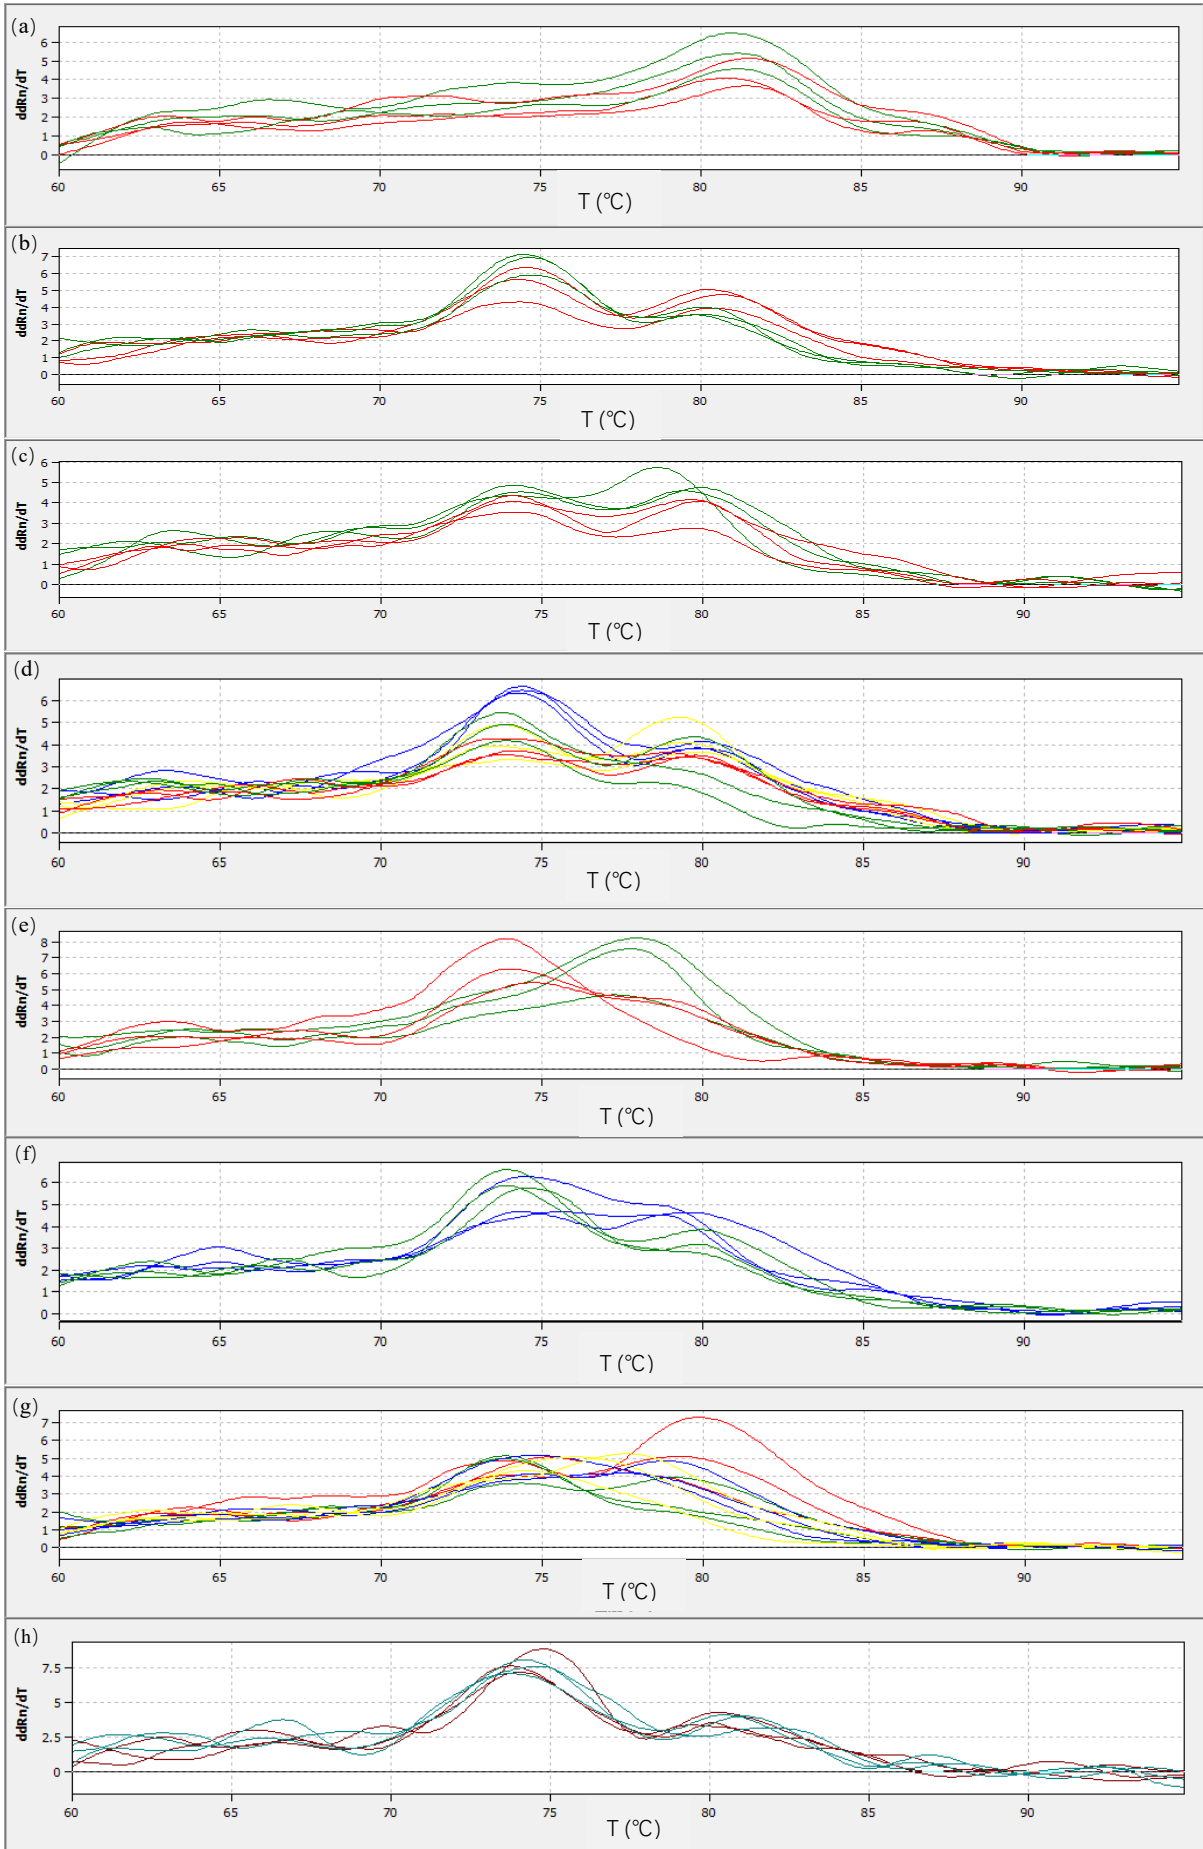



Figure-S3: Some melting curves of other selected miRNAs whose products were unacceptable (a. hsa-miR-4634; b. hsa-miR-425-3p; c. hsa-miR-3610; d. hsa-miR-6840-3p; e. hsa-miR-7111-3p; f. hsa-miR-3195; g. hsa-miR-1908-3p; h. hsa-miR-4763-3p)
